# Supplementary material for: Impact of measles supplementary immunisation activities on utilisation of maternal and child health services in low-income and middle-income countries
Source: PubMed Central journal article supplement (PMC5942424; doi:10.1136/bmjgh-2017-000466), 2018-05-07
Supplement: bmjgh-2017-000466supp001.pdf [file bmjgh-2017-000466supp001.pdf]

## Supplementary appendix

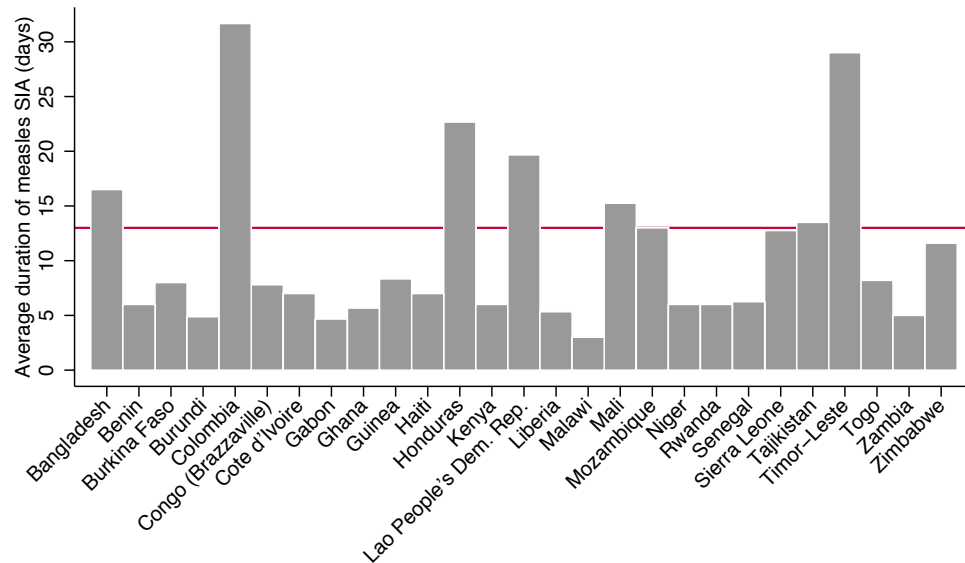

**Supplementary Appendix, Figure A1. Average duration of national measles supplementary immunization activities (SIAs) included in our sample**

Note: Average duration (red line) for the whole sample was 13 days and median duration was 6 days.

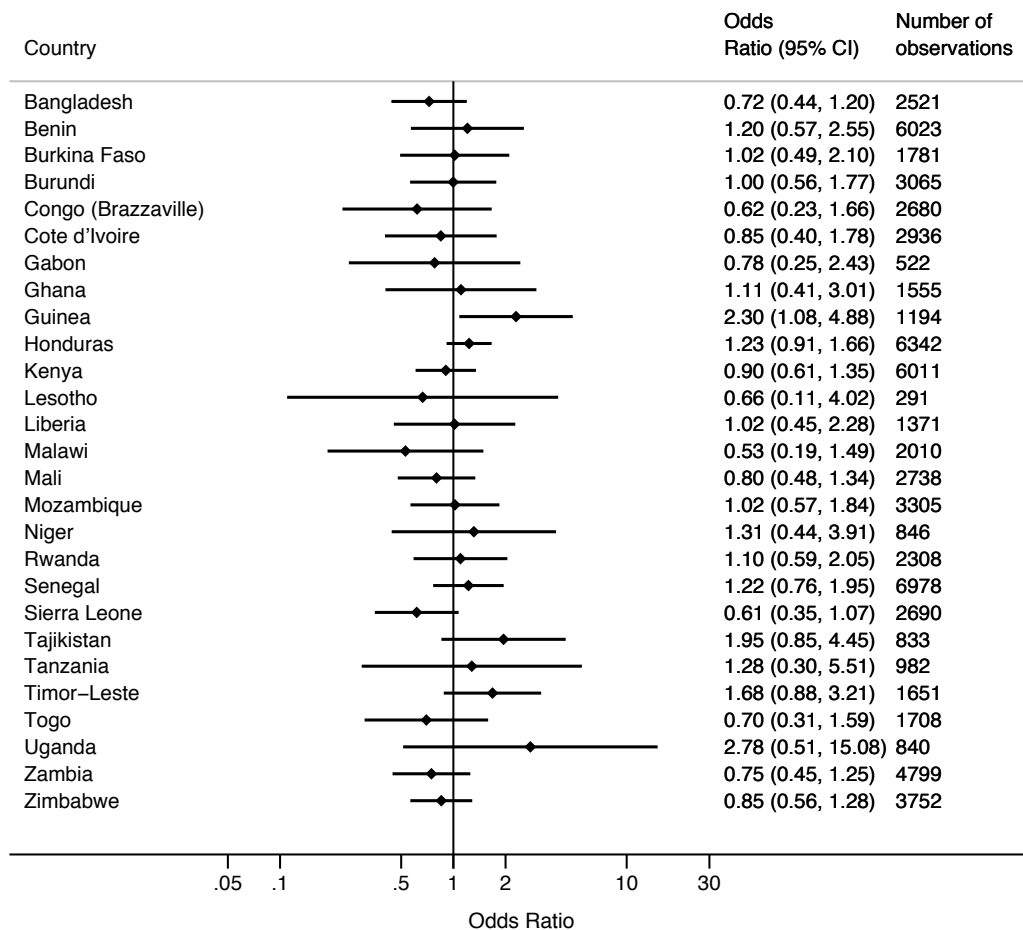

**Supplementary Appendix, Figure A2. Logistic regression results of the impact of measles supplementary immunization activities (SIAs) on facility delivery: country-specific analysis**

Notes: Odds ratios are presented for SIA dummy variable, which is equal to 1 if measles SIA was conducted on day of birth and 0 otherwise. The results are based on country-specific logistic regressions using the same set of covariates as the adjusted models in Table 5 in the main text. Significant results are observed for Guinea only.

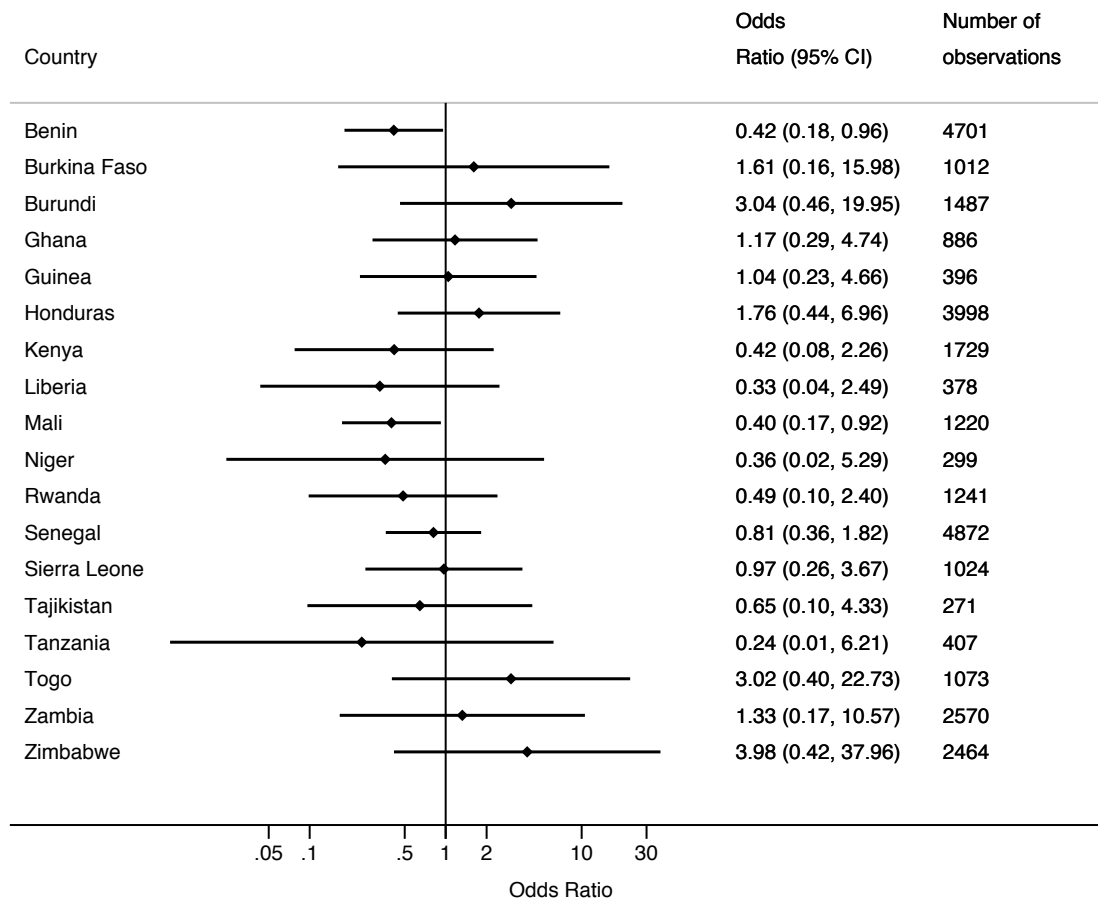

**Supplementary Appendix, Figure A3. Logistic regression results of the impact of measles supplementary immunization activities (SIAs) on whether the newborn was weighed at birth if delivered at a facility: country-specific analysis**

Notes: Odds ratios are presented for SIA dummy variable, which is equal to 1 if measles SIA was conducted on day of birth and 0 otherwise. The results are based on country-specific logistic regressions using the same set of covariates as the adjusted models in Table 5 in the main text. Significant results are observed for Benin and Mali only.

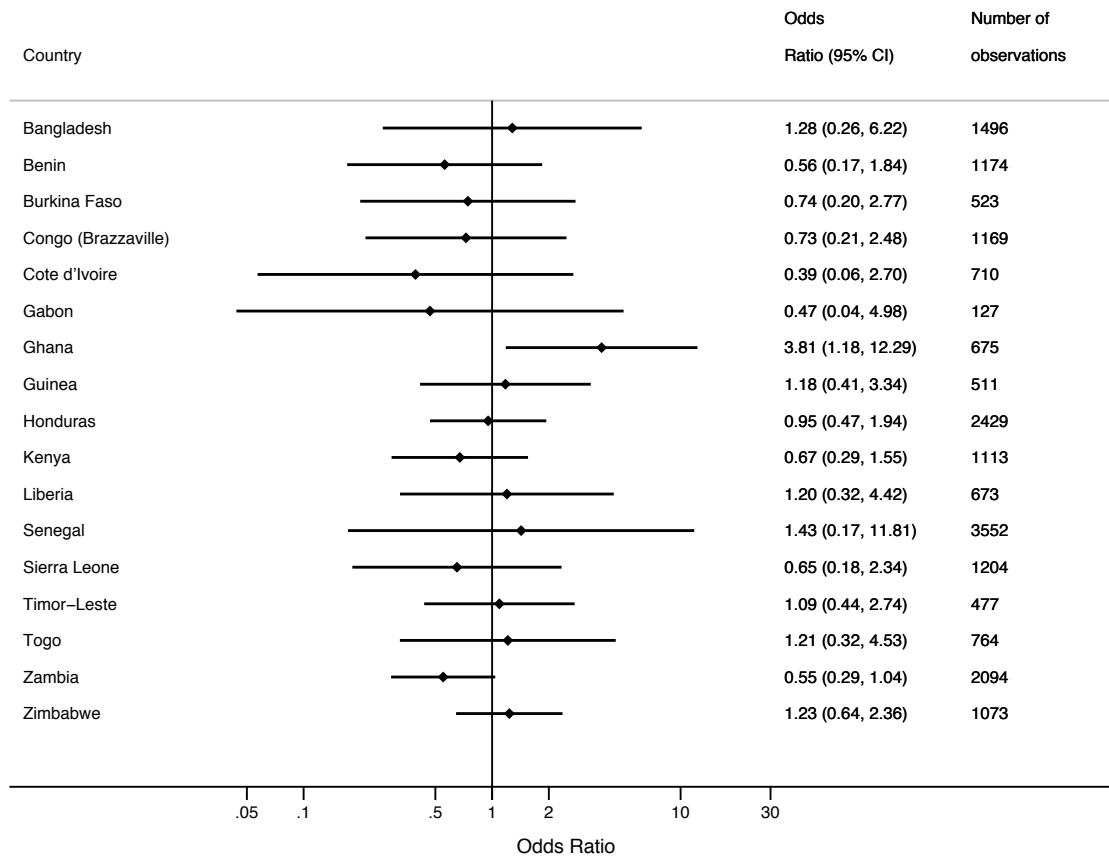

**Supplementary Appendix, Figure A4. Logistic regression results of the impact of measles supplementary immunization activities (SIAs) on whether the baby received a postnatal check within one week of birth: country-specific analysis**

Notes: Odds ratios are presented for SIA dummy variable, which is equal to 1 if measles SIA was conducted on day of birth and 0 otherwise. The results are based on country-specific logistic regressions using the same set of covariates as the adjusted models in Table 5 in the main text. Significant results are observed for Ghana only.

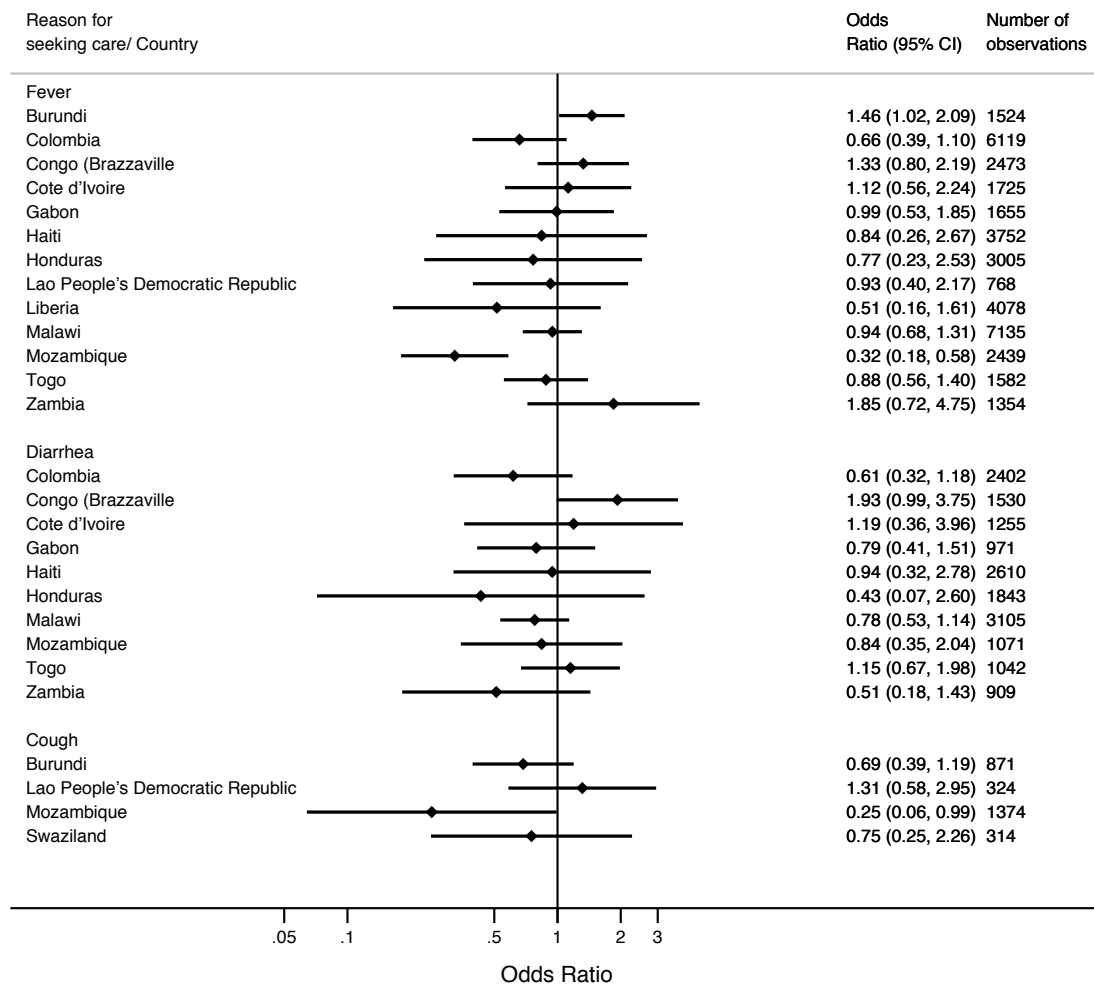

**Supplementary Appendix, Figure A5. Logistic regression results of the impact of measles supplementary immunization activities (SIAs) on care seeking for child fever, diarrhea, and cough: country-specific analysis**

Notes: Odds ratios are presented for SIA dummy variable, which is equal to 1 if measles SIA was conducted during the two-week time period preceding the date of interview and 0 otherwise. The results are based on country-specific logistic regressions using the same set of covariates as the adjusted models in Table 6 in the main text. Significant results are observed for Burundi and Mozambique only.

Supplementary Appendix, Table A1. Logistic regression results of the impact of measles supplementary immunization activities (SIAs) on care-seeking for child fever, diarrhea, and cough: pooled analysis of DHS and MICS data: sensitivity analysis

|                               | Sensitivity analysis       |                            |                           |
|-------------------------------|----------------------------|----------------------------|---------------------------|
|                               | Fever                      | Diarrhea                   | Cough                     |
| SIA                           | 0.99<br>(0.839 - 1.167)    | 0.865<br>(0.636 - 1.176)   | 0.838<br>(0.572 - 1.228)  |
| Urban                         | 1.403**<br>(1.272 - 1.547) | 1.279**<br>(1.104 - 1.481) | 1.337<br>(0.886 - 2.016)  |
| Child's age                   | 0.938**<br>(0.918 - 0.957) | 0.939**<br>(0.904 - 0.975) | 0.915*<br>(0.849 - 0.986) |
| No education                  |                            | <i>ref.</i>                |                           |
| Primary education             | 1.189**<br>(1.079 - 1.310) | 1.215*<br>(1.027 - 1.437)  | 1.344<br>(0.962 - 1.877)  |
| Secondary or higher education | 1.440**<br>(1.292 - 1.605) | 1.353**<br>(1.121 - 1.633) | 1.254<br>(0.910 - 1.728)  |
| 1st wealth quintile (poorest) |                            |                            |                           |
| 2nd wealth quintile           | 1.195**<br>(1.090 - 1.310) | 1.164*<br>(1.010 - 1.342)  | 0.713<br>(0.503 - 1.011)  |
| 3rd wealth quintile           | 1.345**<br>(1.208 - 1.497) | 1.169<br>(0.983 - 1.389)   | 0.903<br>(0.635 - 1.284)  |
| 4th wealth quintile           | 1.327**<br>(1.170 - 1.507) | 1.291*<br>(1.047 - 1.594)  | 1.091<br>(0.762 - 1.564)  |
| 5th wealth quintile (richest) | 1.425**<br>(1.222 - 1.661) | 1.258<br>(0.973 - 1.625)   | 1.057<br>(0.684 - 1.632)  |
| Observations                  | 19,927                     | 8,299                      | 1,509                     |

Notes: Sample limited to countries with SIAs lasting for at least 7 days during the two-week time period. Binary dependent variable equal to 1 if the mother sought care at a facility if the child was ill in the two weeks prior to the survey with each symptom, 0 otherwise. Odds ratios and 95% CI in parentheses. \* indicates significant level of  $p < 0.05$ ; \*\* indicates significance level of  $p < 0.01$ .
